# Supplementary material
Source: publisher figshare collection journal article supplement (https://plos.figshare.com/articles/dataset/_/136880)
Supplement: Supplementary file [file 1]

Supplementary Table 1. All single locus SNPs associated at  $p < 1 \times 10^{-5}$  with either median HDL-C or modeled HDL-C in the Marshfield cohort.

| Chromosome | Position  | SNP        | Genes (w/in 50kb)     | $\beta$ Median | $\beta$ Modeled | SE Median | SE Modeled | T Median | T Modeled | P Median  | P modeled |
|------------|-----------|------------|-----------------------|----------------|-----------------|-----------|------------|----------|-----------|-----------|-----------|
| 3          | 188116469 | rs7627293  | <i>ST6GAL1</i>        | 2.288          | 1.116           | 0.508     | 0.6931     | 4.504    | 1.61      | 6.89E-06  | 0.1076    |
| 8          | 19860651  | rs297      | <i>LPL</i>            | 1.039          | 1.499           | 0.2399    | 0.3309     | 4.332    | 4.53      | 1.52E-05  | 6.16E-06  |
| 8          | 19864685  | rs331      | <i>LPL</i>            | 1.022          | 1.534           | 0.233     | 0.3208     | 4.388    | 4.784     | 1.18E-05  | 1.82E-06  |
| 8          | 19875201  | rs10096633 | <i>LPL</i>            | 1.359          | 1.748           | 0.2985    | 0.4053     | 4.554    | 4.312     | 5.42E-06  | 1.68E-05  |
| 8          | 19888502  | rs12678919 | <i>LPL</i>            | 1.752          | 1.987           | 0.3362    | 0.4594     | 5.211    | 4.325     | 1.99E-07  | 1.58E-05  |
| 8          | 19908967  | rs1441762  | <i>LPL</i>            | 0.9856         | 1.543           | 0.2327    | 0.3202     | 4.236    | 4.82      | 2.34E-05  | 1.53E-06  |
| 8          | 19909455  | rs2083637  | <i>LPL</i>            | 0.9832         | 1.5             | 0.2327    | 0.3203     | 4.225    | 4.682     | 2.45E-05  | 2.99E-06  |
| 8          | 126548497 | rs6982636  | <i>TRIB1</i>          | 0.57           | 1.3             | 0.2018    | 0.2791     | 2.825    | 4.657     | 0.004759  | 3.38E-06  |
| 8          | 126548544 | rs6982502  | <i>TRIB1</i>          | -0.6817        | -1.283          | 0.2028    | 0.2817     | -3.361   | -4.553    | 0.0007848 | 5.53E-06  |
| 8          | 126549549 | rs4871603  | <i>TRIB1</i>          | -0.7327        | -1.395          | 0.2161    | 0.2961     | -3.39    | -4.71     | 0.0007058 | 2.61E-06  |
| 8          | 126557432 | rs2980869  | <i>TRIB1</i>          | 0.5925         | 1.31            | 0.2014    | 0.2784     | 2.941    | 4.707     | 0.003289  | 2.66E-06  |
| 8          | 126565000 | rs10808546 | <i>TRIB1</i>          | 0.7002         | 1.25            | 0.2017    | 0.2773     | 3.472    | 4.505     | 0.0005225 | 6.93E-06  |
| 11         | 116154127 | rs964184   | <i>APOA1/C3/A4/A5</i> | -1.333         | -2.019          | 0.3023    | 0.4087     | -4.41    | -4.939    | 1.06E-05  | 8.37E-07  |
| 15         | 56465804  | rs10468017 | <i>LIPC</i>           | 1.646          | 1.405           | 0.2241    | 0.3052     | 7.343    | 4.603     | 2.57E-13  | 4.38E-06  |
| 15         | 56470658  | rs1532085  | <i>LIPC</i>           | 1.432          | 1.078           | 0.2083    | 0.2849     | 6.874    | 3.784     | 7.30E-12  | 0.0001582 |
| 15         | 56476479  | rs11855284 | <i>LIPC</i>           | 1.997          | 1.771           | 0.263     | 0.3579     | 7.594    | 4.948     | 3.92E-14  | 8.02E-07  |
| 15         | 56478046  | rs415799   | <i>LIPC</i>           | -1.075         | -0.7406         | 0.2037    | 0.2807     | -5.28    | -2.638    | 1.36E-07  | 0.00838   |
| 15         | 56481152  | rs487766   | <i>LIPC</i>           | 1.543          | 1.249           | 0.2476    | 0.3393     | 6.234    | 3.682     | 5.08E-10  | 0.0002362 |
| 15         | 56486302  | rs11856159 | <i>LIPC</i>           | 1.752          | 1.682           | 0.2582    | 0.3497     | 6.786    | 4.811     | 1.34E-11  | 1.59E-06  |
| 15         | 56510771  | rs1077834  | <i>LIPC</i>           | 1.139          | 0.9811          | 0.2466    | 0.3406     | 4.617    | 2.881     | 4.03E-06  | 0.004001  |
| 15         | 56529710  | rs261336   | <i>LIPC</i>           | 1.253          | 1.189           | 0.2748    | 0.376      | 4.561    | 3.162     | 5.25E-06  | 0.001584  |
| 16         | 55542640  | rs9989419  | <i>CETP</i>           | -1.442         | -1.449          | 0.2058    | 0.28       | -7.007   | -5.175    | 2.89E-12  | 2.47E-07  |
| 16         | 55550825  | rs3764261  | <i>CETP</i>           | 2.25           | 2.138           | 0.2133    | 0.2907     | 10.55    | 7.352     | 1.22E-25  | 2.63E-13  |
| 16         | 55552395  | rs4783961  | <i>CETP</i>           | 0.9799         | 0.8336          | 0.2049    | 0.2789     | 4.782    | 2.989     | 1.81E-06  | 0.002826  |
| 16         | 55552737  | rs1800775  | <i>CETP</i>           | 2.068          | 1.928           | 0.1989    | 0.2698     | 10.4     | 7.146     | 5.55E-25  | 1.17E-12  |
| 16         | 55553789  | rs708272   | <i>CETP</i>           | 1.955          | 1.943           | 0.2028    | 0.2763     | 9.64     | 7.033     | 9.79E-22  | 2.60E-12  |
| 16         | 55554734  | rs1864163  | <i>CETP</i>           | -2.161         | -1.832          | 0.23      | 0.3156     | -9.395   | -5.806    | 9.78E-21  | 7.19E-09  |
| 16         | 55560647  | rs11076174 | <i>CETP</i>           | -1.708         | -1.406          | 0.3571    | 0.4834     | -4.782   | -2.909    | 1.81E-06  | 0.003661  |
| 16         | 55562980  | rs1532624  | <i>CETP</i>           | 2.015          | 2.006           | 0.2015    | 0.274      | 10       | 7.32      | 3.00E-23  | 3.33E-13  |
| 16         | 55564091  | rs7499892  | <i>CETP</i>           | -2.654         | -2.412          | 0.2637    | 0.361      | -10.06   | -6.68     | 1.61E-23  | 2.94E-11  |
| 16         | 55568686  | rs4784744  | <i>CETP</i>           | -1.119         | -1.025          | 0.216     | 0.295      | -5.182   | -3.473    | 2.32E-07  | 0.0005234 |
| 16         | 55573593  | rs5882     | <i>CETP</i>           | 1.117          | 0.9384          | 0.2202    | 0.3048     | 5.073    | 3.079     | 4.10E-07  | 0.002103  |
| 16         | 55575603  | rs289744   | <i>CETP</i>           | 1.247          | 1.104           | 0.2226    | 0.3075     | 5.603    | 3.591     | 2.27E-08  | 0.0003358 |
| 18         | 32192058  | rs7244352  | <i>FHOD3</i>          | -0.5103        | -1.273          | 0.2044    | 0.2778     | -2.496   | -4.581    | 0.0126    | 4.85E-06  |
